# Supplementary material
Source: PubMed Central journal article supplement (PMC3697663)

**Supplementary Figure 1. Neighbor-joining tree of NoV GII.4 sequences (region C) including GII.4-2012 outbreak strains identified in Alberta.** The phylogenetic analysis was performed using Kimura 2 parameter model with gamma-distribution of rate variation among sites and 1000 bootstrap replicates.

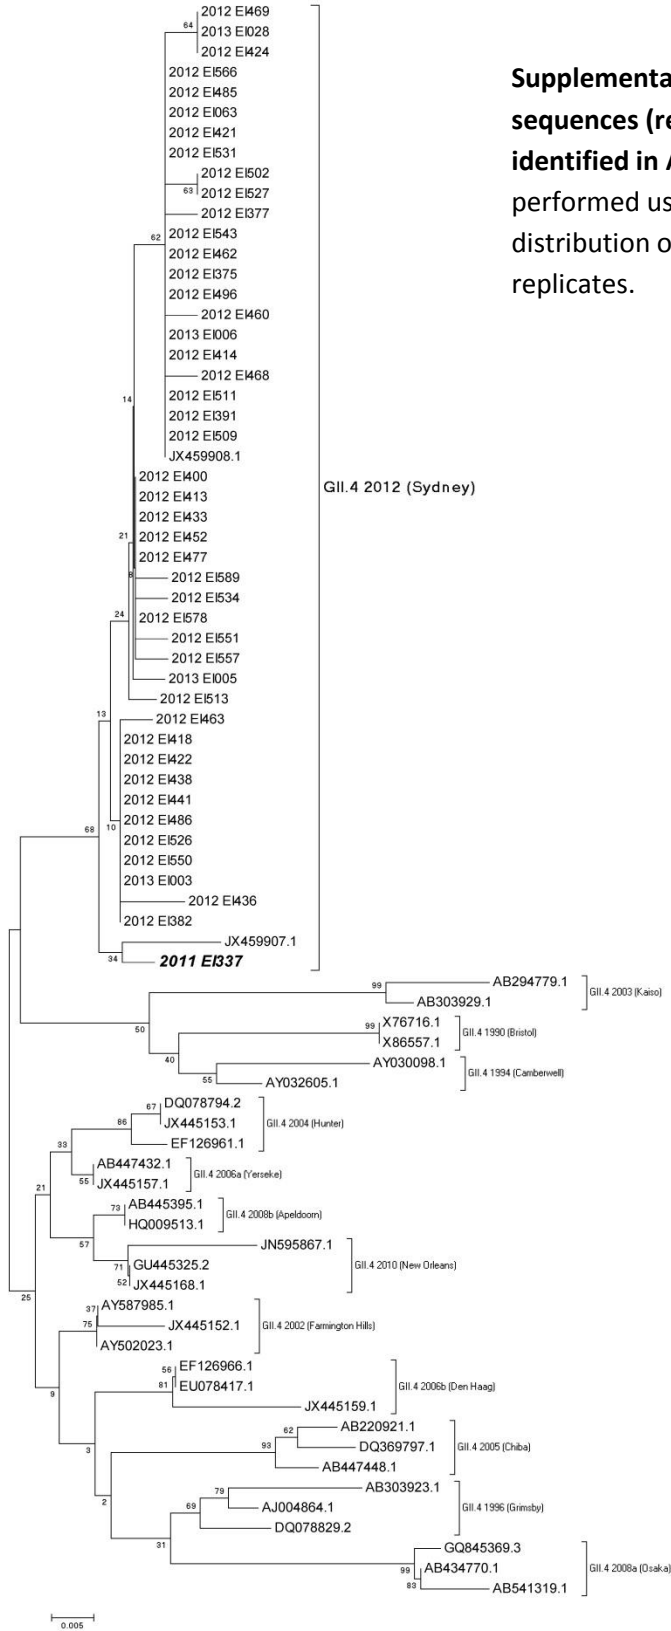

Supplement: JCM.00663-13_zjm999092625so1.pdf [file JCM.00663-13_zjm999092625so1.pdf]
