# Supplementary material
Source: PubMed Central journal article supplement (PMC3697663)
Supplement: JCM.00663-13_zjm999092625so2.pdf [file JCM.00663-13_zjm999092625so2.pdf]

**Supplementary Table.** Reference sequences used for NoV genotyping.

| ACCESSION NUMBER | NAME                       | ORF2 GENOTYPE                 |
|------------------|----------------------------|-------------------------------|
| L23828.1         | SRSV-KY-89/89/JP           | GI.1                          |
| M87661.2         | CVXRNA                     | GI.1                          |
| AJ277610.1       | Whiterose/96/UK            | GI.2                          |
| L07418.1         | Southampton/1991/UK        | GI.2                          |
| AB187514.1       | Otofuke/1979/JP            | GI.3                          |
| AJ277612.1       | Birmingham/1993/UK         | GI.3                          |
| AB042808.1       | Chiba 407/1987/JP          | GI.4                          |
| AJ313030.1       | Queen's Arms/Leeds/1992/UK | GI.4                          |
| AJ277614.1       | Musgrove/1989/UK           | GI.5                          |
| AB081723.1       | WUG1                       | GI.6                          |
| AJ277615.1       | Sindlesham/1995/UK         | GI.6                          |
| AJ277609.1       | Winchester/1994/UK         | GI.7                          |
| AF538679.1       | Boxer/2001/US              | GI.8                          |
| AJ277606.1       | Girlington/1993/UK         | GII.1                         |
| AY919139.1       | Picton/2003/AU             | GII.1                         |
| U07611.2         | Hawaii/1971/US             | GII.1                         |
| DQ366347.1       | OsakaNI/2004/JP            | GII.2                         |
| U70059.1         | Snow_Mountain              | GII.2                         |
| X81879.1         | Melksham                   | GII.2                         |
| AF190817.1       | Arg320                     | GII.3                         |
| EU187437.1       | 5017.34/2003/JP            | GII.3                         |
| U02030.1         | Toronto/1991/CA            | GII.3                         |
| X76716.1         | Bristol/1993/UK            | GII.4 1990 (Bristol)          |
| X86557.1         | Lordsdale                  | GII.4 1990 (Bristol)          |
| AY032605.1       | MD145-12/1987/US           | GII.4 1994 (Camberwell)       |
| AY030098.1       | MD134-7/1987/US            | GII.4 1994 (Camberwell)       |
| AB303923.1       | DenHaag015/2000/NL         | GII.4 1996 (Grimsby)          |
| AJ004864.1       | Grimsby                    | GII.4 1996 (Grimsby)          |
| DQ078829.2       | Sydney348/970/AU           | GII.4 1996 (Grimsby)          |
| AY502023.1       | Farmington Hills/2002/US   | GII.4 2002 (Farmington Hills) |
| AY587985.1       | Oxford/B4S6/2002/UK        | GII.4 2002 (Farmington Hills) |
| JX445152.1       | AlbertaEI131/2004/CA       | GII.4 2002 (Farmington Hills) |
| AB294779.1       | Kaiso/030556/2003/JP       | GII.4 2003 (Kaiso)            |
| AB303929.1       | EmmenE006/2002/NL          | GII.4 2003 (Kaiso)            |
| DQ078794.2       | Hunter_284E/040/AU         | GII.4 2004 (Hunter)           |
| EF126961.1       | Dongen46/2006/NL           | GII.4 2004 (Hunter)           |
| JX445153.1       | AlbertaEI142/2006/CA       | GII.4 2004 (Hunter)           |
| AB220921.1       | Chiba/04-1050/2005/JP      | GII.4 2005 (Chiba)            |
| AB447448.1       | Sakai2/2006/JP             | GII.4 2005 (Chiba)            |
| DQ369797.1       | Guangzhou/NVgz01/CN        | GII.4 2005 (Chiba)            |
| GU445325.2       | New Orleans1805/2009/US    | GII.4 2010 (New Orleans)      |
| JN595867.1       | New Orleans/2010/US        | GII.4 2010 (New Orleans)      |
| JX445168.1       | AlbertaEI388/2011/CA       | GII.4 2010 (New Orleans)      |
| JX459907.1       | Woonona/SWW3309/2012/AU    | GII.4 2012 (Sydney)           |
| JX459908.1       | Sydney/NSW0514/2012/AU     | GII.4 2012 (Sydney)           |
| AB447432.1       | Aomori1/2006/JP            | GII.4 2006a (Yerseke)         |
| JX445157.1       | AlbertaEI513/2006          | GII.4 2006a (Yerseke)         |
| EF126966.1       | Nijmegen115/2006/NL        | GII.4 2006b (Den Haag)        |

| ACCESSION NUMBER | NAME                            | ORF2 GENOTYPE           |
|------------------|---------------------------------|-------------------------|
| EU078417.1       | OSD-CS/2006/US                  | GII.4 2006b (Den Haag)  |
| JX445159.1       | AlbertaEI009/2008/CA            | GII.4 2006b (Den Haag)  |
| AB434770.1       | OC07138/07/JP                   | GII.4 2008a (Osaka)     |
| AB541319.1       | Osaka1/2007/JP                  | GII.4 2008a (Osaka)     |
| GQ845369.3       | Armidale/NSW390I/2008/AU        | GII.4 2008a (Osaka)     |
| AB445395.1       | Apeldoorn317/2007/NL            | GII.4 2008b (Apeldoorn) |
| HQ009513.1       | JB15/KOR/2008                   | GII.4 2008b (Apeldoorn) |
| AB212306.1       | Hokkaido/133/2003/JP            | GII.5                   |
| AF414423.1       | White_River/290/1994/US         | GII.5                   |
| AY682550.1       | S63/1999/FR                     | GII.5                   |
| AB039778.1       | Saitama_U16                     | GII.6                   |
| AF414410.1       | Miami/292/1994/US               | GII.6                   |
| AJ277620.1       | Seacroft/90/UK                  | GII.6                   |
| AB258331.1       | Osaka/F140/2006/JP              | GII.7                   |
| DQ078846.2       | Sydney4477/02S/AU               | GII.7                   |
| GQ849129.1       | NSW088L/2007/AU                 | GII.7                   |
| AB039780.1       | Saitama_U25                     | GII.8                   |
| AB067543.1       | U25GII                          | GII.8                   |
| AF195848.1       | Amsterdam/98-18/1998/NL         | GII.8                   |
| AY038599.2       | VA97207/1997                    | GII.9                   |
| DQ379715.1       | Goulburn_Valley_G5175_C/1983/AU | GII.9                   |
| AF427118.1       | Erfurt/546/00/DE                | GII.10                  |
| AY237415.2       | Mc37                            | GII.10                  |
| AB074893.1       | Sw918/1997/JP                   | GII.11                  |
| AB126320.1       | swine43/JP                      | GII.11                  |
| AB039775.1       | Saitama_U1                      | GII.12                  |
| AF414420.1       | Honolulu/314/1994/US            | GII.12                  |
| AJ277618.1       | Wortley/1990/UK                 | GII.12                  |
| AB078334.1       | Kashiwa47                       | GII.13                  |
| AY113106.1       | Fayetteville/1998/US            | GII.13                  |
| DQ379714.1       | Goulburn_Valley_G5175_B/1983/AU | GII.13                  |
| AY130761.1       | M7/1999/US                      | GII.14                  |
| EF547404.1       | Maizuru/010426/2001/JP          | GII.14                  |
| AF542090.1       | Mex7076/1999                    | GII.15                  |
| AY130762.1       | J23/1999/US                     | GII.15                  |
| AY502010.1       | Tiffin/1999/US                  | GII.16                  |
| AY682551.1       | VannesL23/1999/FR               | GII.16                  |
| AY772730.1       | Neustrelitz260/2000/DE          | GII.16                  |
| AY502009.1       | CS-E1/2002/US                   | GII.17                  |
| DQ438972.1       | Katrina-17/2005/US              | GII.17                  |
| AY823304.1       | OH-QW101/2003/US                | GII.18                  |
| AY823305.1       | OH-QW125/2003/US                | GII.18                  |
| AY823306.1       | OH-QW170/2003/US                | GII.19                  |
| AY823307.1       | OH-QW218/2003/US                | GII.19                  |
| AB083780.1       | YURI                            | GII.NA2                 |
| AY675554.1       | IF1998/2003/IQ                  | GII.NA3                 |
| AJ844470.1       | Chiba/04-0502/2004/JP           | GII.NA4                 |
| EU373815.1       | Luckenwalde591/2002/DE          | GIINA1                  |
| EU424333.1       | Leverkusen267/2005/DE           | GIINA1                  |
